# Supplementary material for: Facile synthesis of flower-shaped Au/GdVO4:Eu core/shell nanoparticles by using citrate as stabilizer and complexing agent
Source: Royal Society of Chemistry journal article supplement (doi:10.1039/c5ra23958c), 2016-01-01
Supplement: c5ra23958c1.pdf [file c5ra23958c1.pdf]

Supplemental Information

## Facile Synthesis of Flower-Shaped Au/GdVO<sub>4</sub>:Eu Core/Shell Nanoparticles by Using Citrate as Stabilizer and Complexing Agent

Ming Chen,<sup>a</sup> Jia-Hong Wang,<sup>a</sup> Zhi-Jun Luo,<sup>a</sup> Zi-Qiang Cheng,<sup>a</sup> Ya-Fang Zhang,<sup>a</sup> Xue-Feng Yu,<sup>a</sup> Li

Zhou,<sup>\*a</sup> Qu-Quan Wang<sup>\*ab</sup>

<sup>a</sup>School of Physics and Technology, and Key Laboratory of Artificial Micro- and Nano-structures of Ministry of Education, Wuhan University, Wuhan 430072, P.R.China

<sup>b</sup>The Institute of Advanced Studies, Wuhan University, Wuhan 430072, P.R.China

\*E-mail: zhouli@whu.edu.cn (L.Z.), \*E-mail: qqwang@whu.edu.cn (Q.Q.W.).

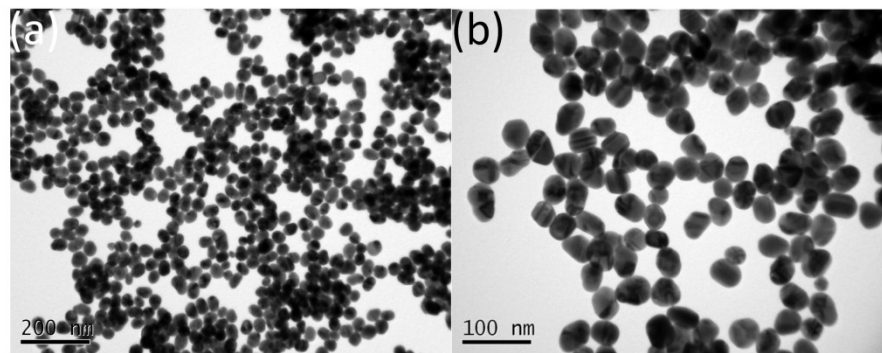

**Figure S1.** TEM images of Au NPs.

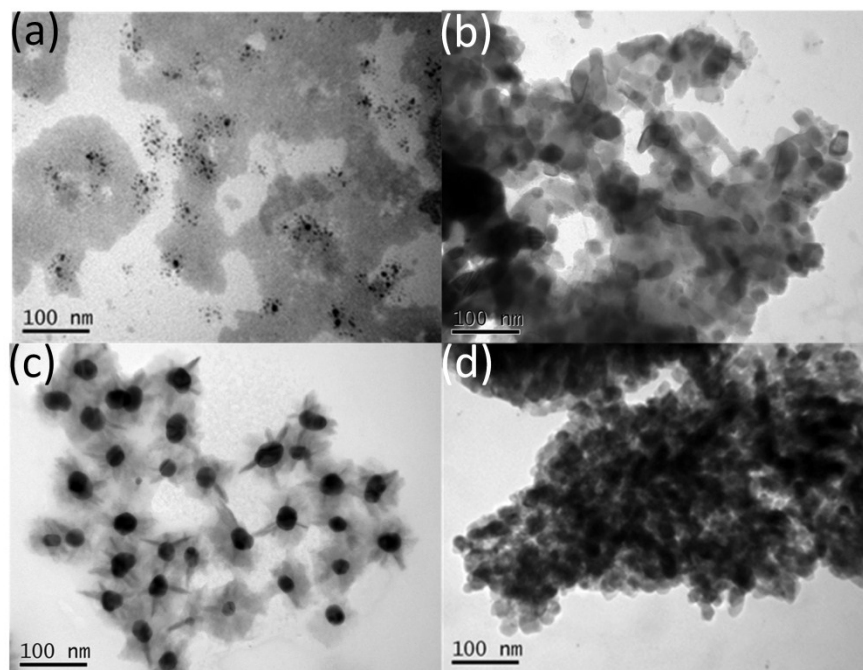

**Figure S2.** TEM images of Au/GdVO<sub>4</sub>:Eu NPs synthesized a) using CTAB-stabilized Au NPs, b) without/with a small amount of sodium citrate, c) with moderate sodium citrate, d) with excess sodium citrate.

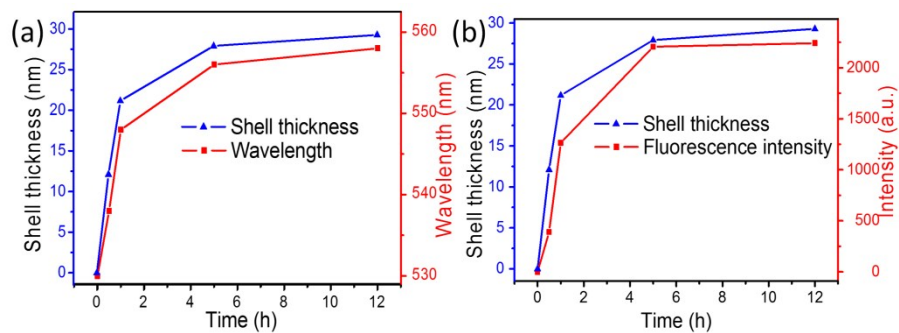

**Figure S3.** The increasing trend of different reaction times: the thickness of vanadate shells versus a) SPR peak wavelength and b) the fluorescence intensity.

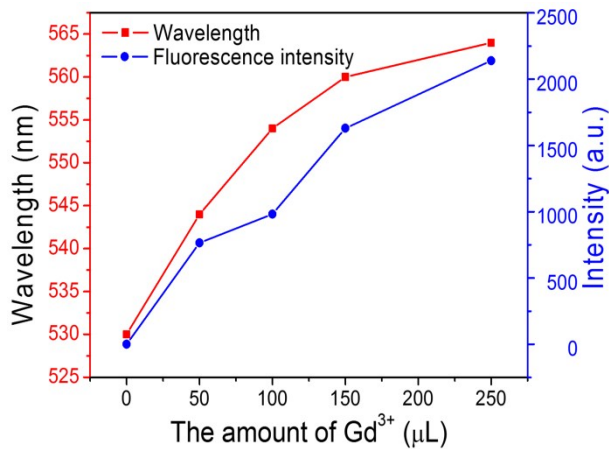

**Figure S4.** The increasing trend with different amount of 0.1 M Gd(NO<sub>3</sub>)<sub>3</sub> aqueous solution: SPR peak wavelength versus the fluorescence intensity.

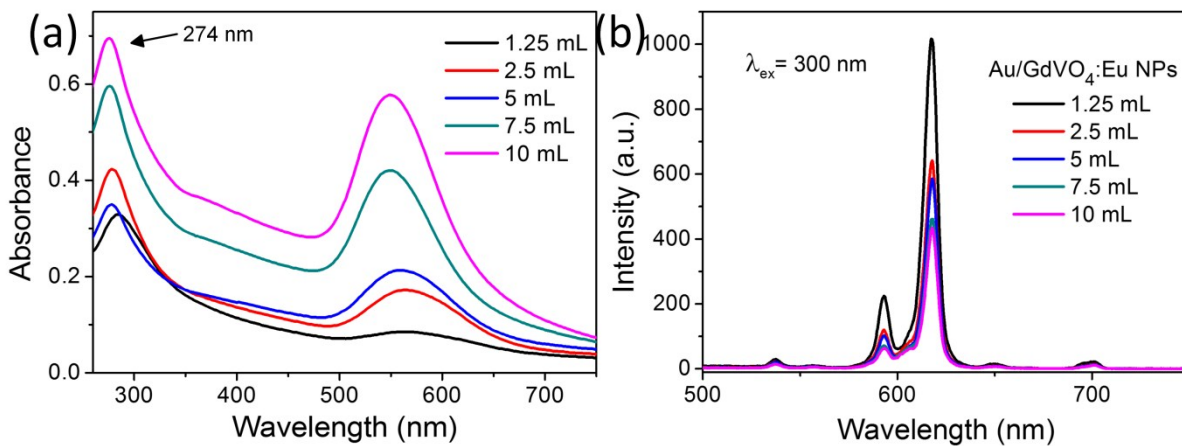

**Figure S5.** (a) Absorption and (b) fluorescence spectra of Au/GdVO<sub>4</sub>:Eu NPs with different amount of as-synthesized AuNPs. The volume of 0.1 M Gd(NO<sub>3</sub>)<sub>3</sub> aqueous solution is 200 μL.
